# Supplementary material
Source: MDPI journal article supplement (https://www.mdpi.com/2072-4292/10/12/1867)
Supplement: s1 [file s1]

**Table S1.** Model parameters and equations.  $\alpha = 1.26$  is the Priestley-Taylor coefficient (Priestley and Taylor [26]),  $\Delta$  is the slope of the saturation to vapor pressure curve,  $\gamma$  is the psychrometric constant, RH is relative humidity, VPD is the saturation vapor pressure deficit,  $\beta = 3.0$  is a sensitivity parameter,  $T_a$  is the air temperature in Celsius,  $NDVI_{soil} = 0.05$  and  $NDVI_{veg} = 0.84$  are the minimum value of NDVI over bare soil and maximum value of NDVI of the vegetated areas for the study period respectively,  $m_2 = 1.0$  and  $b_2 = -0.05$  (Fisher et al. [27]),  $A = 0.31$  and  $B = 74,000$  (Santanello and Friedl [58]),  $k_{rn} = 0.6$  (Fisher et al. [27]), LAI is the leaf area index (Houborg and McCabe [46]),  $NIR$  and  $Red$  are the near infrared and red band reflectance values (Houborg and McCabe [46]). In the reference column, original study refers to the formulation proposed by Fisher et al. [27].

| Parameter  | Description                                                                           | Equation                                                                                       | Reference                  |
|------------|---------------------------------------------------------------------------------------|------------------------------------------------------------------------------------------------|----------------------------|
| $ET$       | Evapotranspiration                                                                    | $ET_c + ET_s + ET_i$                                                                           | Original study             |
| $ET_c$     | Canopy transpiration                                                                  | $(1 - f_{wet}) \cdot f_g f_T f_M \cdot \alpha \frac{\Delta}{\Delta + \gamma} \cdot Rn_c$       | Original study             |
| $ET_s$     | Soil evaporation                                                                      | $(f_{wet} + f_{SM}(1 - f_{wet})) \cdot \alpha \frac{\Delta}{\Delta + \gamma} \cdot (Rn_s - G)$ | Original study             |
| $ET_i$     | Interception evaporation                                                              | $f_{wet} \cdot \alpha \frac{\Delta}{\Delta + \gamma} \cdot Rn_c$                               | Original study             |
| $f_{wet}$  | Relative surface wetness                                                              | $RH^4$                                                                                         | Original study             |
| $f_g$      | Green canopy fraction                                                                 | $\frac{f_{APAR}}{f_{IPAR}}$                                                                    | Original study             |
| $f_T$      | Plant temperature constraint                                                          | $\frac{1}{1 + e^{0.2 \cdot (12 - T_a)}}$                                                       | This study                 |
| $f_M$      | Plant moisture constraint                                                             | $\frac{f_{APAR}}{f_{APARmax}}$                                                                 | Original study             |
| $f_{SM}$   | Soil moisture constraint                                                              | $RH^{VPD/\beta}$                                                                               | Original study             |
| $f_{APAR}$ | Fraction of photosynthetically active radiation absorbed by green vegetation cover    | $(NDVI - NDVI_{soil}) / (NDVI_{veg} - NDVI_{soil})$                                            | Wittich and Hansing [61]   |
| $f_{IPAR}$ | Fraction of photosynthetically active radiation intercepted by total vegetation cover | $m_2 NDVI + b_2$                                                                               | Original study             |
| $G$        | Soil heat flux                                                                        | $A \cdot \cos\left(\frac{2\pi(t + 10,800)}{B}\right) \cdot Rn_s$                               | Santanello and Friedl [58] |
| $Rn_s$     | Net radiation that reaches the soil                                                   | $Rn \cdot e^{-k_{rn} \cdot LAI}$                                                               | Original study             |
| $Rn_c$     | Net radiation to the canopy                                                           | $Rn - Rn_s$                                                                                    | Original study             |
| $NDVI$     | Normalized difference vegetation index                                                | $\frac{NIR - Red}{NIR + Red}$                                                                  | Original study             |
